# Supplementary material for: Unique Evolution of Antiviral Tetherin in Bats
Source: PubMed Central journal article supplement (PMC9599465; doi:10.1128/jvi.01152-22), 2022-09-29
Supplement: jvi.01152-22-s0001.pdf [file jvi.01152-22-s0001.pdf]

**Supplementary Information:**

**Unique Evolution of Antiviral Tetherin in Bats**

Joshua A. Hayward<sup>a,b</sup>, Mary Tachedjian<sup>c</sup>, Adam Johnson<sup>a</sup>, Aaron T. Irving<sup>d,e,f</sup>, Tamsin B. Gordon<sup>a,b</sup>, Jie Cui<sup>g,h</sup>, Alexis Nicolas<sup>c</sup>, Ina Smith<sup>c</sup>, Vicky Boyd<sup>c</sup>, Glenn A. Marsh<sup>c</sup>, Michelle L. Baker<sup>c</sup>, Lin-Fa Wang<sup>f,i,j</sup>, Gilda Tachedjian<sup>a,b,j</sup>

<sup>a</sup>Health Security Program, Life Sciences Discipline, Burnet Institute, Life Sciences, Melbourne, VIC 3004, Australia; <sup>b</sup>Department of Microbiology, Monash University, Clayton, VIC 3168, Australia; <sup>c</sup>CSIRO, Australian Centre for Disease Preparedness, Health and Biosecurity Business Unit, Geelong, VIC 3220, Australia; <sup>d</sup>Zhejiang University-University of Edinburgh Institute, Zhejiang University School of Medicine, Zhejiang University International Campus, China; <sup>e</sup>Second Affiliated Hospital, Zhejiang University School of Medicine, Hangzhou, China; <sup>f</sup>Programme in Emerging Infectious Diseases, Duke-NUS Medical School, Singapore, Singapore; <sup>g</sup>CAS Key Laboratory of Molecular Virology & Immunology, Institut Pasteur of Shanghai, Chinese Academy of Sciences, China; <sup>h</sup>Center for Biosafety Mega-Science, Chinese Academy of Sciences, China; <sup>i</sup>Singhealth Duke-NUS Global Health Institute, Singapore; <sup>j</sup>Department of Microbiology and Immunology, The University of Melbourne, at The Peter Doherty Institute for Infection and Immunity, Melbourne, VIC 3000, Australia.

<sup>1</sup>To whom correspondence may be addressed. Email: [gilda.tachedjian@burnet.edu.au](mailto:gilda.tachedjian@burnet.edu.au)

**This PDF file includes:**

SI Data 1

## SI Data

**Data SI 1.** Multiple sequence alignment of 27 bat tetherin protein homologues of human I-tetherin.

```
>Tetherin_(Cynopterus_sphinx)
MAPTWYHYFPVPMGDYSEKPALRDRKLP---GWLWIPLVLV---GLGLLV
A---LIIFIIKANSEACKDGLRAEQKCRNETHLLELQLTRAQESLVAAKA
QAASCNQTVETLKSSLEMEKAESQKQKLAQELQGEIRNLKQELEN----
-----TAA-----ELEQLRKEHEKN----
-GEKNGSTSF-----RDARSSLVVAVLLGLSFGALLA
>Tetherin_(Pteropus_alecto)_Isoform_A
MAPTLYHYFPVPMDDHSKVVLGNRNLP---RXLWILLVLV---ILGLTV
A---VIVLAVENSSEACKNGLQAEQKCRNETHLLKLQLTQTQESLGVAKA
QAASCNQTVGTLNSSLEMEKAESQKQRELAQKLQGEITNLTQQLKN----
-----TAA-----ELEQLRKEHAS-----
-GEKNGSTSS-----RNARSSLVVVLLSLSFRALLA
>Tetherin_(Pteropus_vampyrus)
MAPTLYHYFPVPMDDHSKVVLGDRKLP---GWLGILLVLV---ILGLIV
A---VIVLAVKANSEACKDGLQAEQKCRNTHLLELQLTQAQESLGVAKA
QAASCNQTVGTLKSSLEMEKAESQKQRELAQELQGEITNLTQQLKN----
-----TAA-----ELEQLRKEHAS-----
-GEKNGSTSS-----RNAGSSLVVVLLSLSFRALLA
>Tetherin_(Eidolon_helvum)
MAPTWYHYFPVPMDDHSEKLKLGNRKLP---GWLCILLVLV---ALGLLV
P---LIVFIIKANSEACKDGLRAEEKCRNKTDLLELQLTQAQESLVVAKD
QTALCNQTVGTLKLSLEMEKAESQKQRELAQELQGEIRNLKQKLEN----
-----TAA-----ELEQLRKEHAS-----
-GEKNGATSS-----RNARSSLVVAVLLSLSFIALLA
>Tetherin_(Eonycteris_spelaea)
MAPTLYHYFPVPMDDHPKRVLGNRKLP---KWLQILLVLA--ALLSLLV
P---LIFFAIKANSEACKDGLLAEQKCQNKTHLLELQLTQAQESLVVAED
QAVLCNRTVATLNSLEMEKAESQKQRELAQELQGEIWNLKQKLEN----
-----TMA-----ELEQLRKEHES-----
-DEKNGSTSS-----GNARSSLVVAVLLSLSFGALLA
>Tetherin_(Rousettus_aegyptiacus)
MAPALYHYFPVPMDDHSEKVVLRNRKML---KWLWILPVLA--LVLSLLV
A---LIVFAIEANSKACKDGLLAEQKCLNKTRLLELQLTQAQESLVVAEA
QAYLCNQTVGTLKSSLEMEKDESQKQRELAQKLQGENGNLQELEN----
-----MMA-----ELEQLRKEHAS-----
-DEKNGSTSS-----RNARSFLVVAVLLSLSFGALLA
>Tetherin_(Myotis_lucifugus)
MAPTFYCHPPVLMDEYPKK--MGDRKLPVREG---ILLGLL---VVGLFV
A---VGVLAAKANSPACKDGLRAEQECRNTHLLEQELTQAQEVLRGTEA
QAATCNQTVETLKISLKEEKAAGHKQQELVQKLQEEIKTLNQSLQN----
-----KSSELEKKSAELEQLRKENEAL----
-VSAKGPPDS-----GVSLHLSMAAVLLPLSLLVLLA
>Tetherin_(Myotis_brandtii)
MAPTFYCHPTVPMDEYPKK--LGDRKLPVREGIVGILLVVV---VGLSV
A---VGVLAAKANSPACKDGLPAEQECRNITHLLEQELTQAQEVLRTEA
QAATCNQTVETLKISLKEEKAAGHKQQELVQKLQEEIKTLNQSLQD----
-----KSAELEEKSSELEQLRKENEDL----
-VSAKGPPNS-----GITLRLSVAAVLLSLSLLTLLA
>Tetherin_(Myotis_davidii)
MAPTSYCHPPVPMDEYPKK--LGDRKLPVREGIVGILLGLL---VVGLSV
A---VGVLAAKANSPACNDGLRAEQECRNITHLLEQELTQAQEVLRGTEA
QSATCNQTVETLKISLKEEKAVGLRQQELVQKLQEEIKTLNQSLKD----
```

```

-----KSAELEEKSTELGKLRKENEAL-----
-VSAKGPPNS-----GITLSFSVVAVLLPMSLLALLA
>Tetherin_(Myotis_myotis)
MAPTFYCHPPVPMDEYPKK--LGERKLPVREGIVGILLGLL---VVGLSV
A---VGVLAANKANSPACKDGLQAEQEQRNITHLLEQELTQAQEVLRGTEA
QAATCNQTVETLKISLKEEKAAGHKQQELVQKLQEEIKTLNQSLRD----
-----KSAADLEKKSAAEELQLRKENEAL-----
-VSAKGPPNS-----GITLSLSVAAVLLPLSLQALLA
>Tetherin_(Myotis_laniger)
MAPTFYCHPPVPMDEYPKK--LGDRKLPVREGIVWILLGLL---VVGLSV
A---VGVLAANKANSPACKDGLLAEQEQRNITHLLEQELTQAQEVLRGTEA
QAATCNQTVETLKISLKEEKAAGHRQQELVQKLQEEIKTLNQSLQE----
-----KSAELEEKKSAAEELQLRKENEAL-----
-VSAKGPPNS-----GITLSLSVVAVLLPMSLLALLA
>Tetherin_(Myotis_macropus)
MAPTFYCHPPVPMDEYPKK--LGDQKLPVREGIVWILLGLL---VVGLSV
A---VGVLAANKANSPACKDGLLAEQEQRNITHLLEQERTQAQEVLRGTEA
QAATCNQTVETLKISLKEEKAAGHRQQELVQKLQEEIKTLNQSLQE----
-----KSAELEEKKSAAEELQLRKENEAL-----
-VSAKGPPNS-----GITLSLSVVAVLLPMSLLALLA
>Tetherin_(Myotis_ricketti)
MAPTFYCHPPVPMDEYPKK--LGDQKLPVREGIVWILLGLL---VVGLSV
A---VGVLAANKANSPACKDGLLAEQEQRNITHLLEQERTQAQEVLRGTEA
QAATCNQTVETLKISLKEEKAAGHRQQELVQKLQEEIKTLNQSLQE----
-----KSAELEEKKSAAEELQLRKENEAL-----
-VSAKGPPNS-----GITLSLSVVAVLLPMSLLALLA
>Tetherin_(Murina_leucogaster)
MAPTFYCHPPVPMDEYPKK--LGDRKLPVREGIVGILLGLL---VVSLSV
A---VGVLAANKANSPACKDGLRAEQEQRNITHLLEQELTQAQEVLRGTEA
QAATCNQTVETLKISLKEEKAAGHRQQELVQKLQEEIKTLNQELQE----
-----KSA-----ELEQLRKENEAL-----
-VSAKGPPNS-----GITLSLSVVAVLLPMSLLALLA
>Tetherin_(Hipposideros_armiger)
MAPISYKYCPVSMDDNLSP--LQSRKLP---WWLWILLAVVLMVLVILIV
L---TIFFAVRANSKACKDGLQAEQEQRNIFTHLLEHQLTQANKVLLDAEI
WAATCNKTVETLTASLEMEKARGHKQQELVQKLQGEIAELKQKLQD----
-----TSK-----ELDRLRKETETS-----
-DTGNGSTTNGSTSTFGDTINLFVVSVLLTSLGALLA
>Tetherin_(Rhinolophus_ferrumequinum)
MAPISCHYRPVPMGDGLNS-VLGGRKAP---CWLVIIMLVVG---VGILLV
P---LSIFAVKANRESCDKGLLAEQKCNLTHLLEHQLTQAHNLLKMKMKN
QTATCNQTVVTLKASLEAEKAQGPKQQLLQELQGEIKKLKQKLQD----
-----TTT-----ELKQLRKKNEAS-----
-EEGKGSTSS-----GNTINPLVIHVLLTSLRALLA
>Tetherin_(Rhinolopus_macrotois)
MAPVSCHYRPVSMDDKLTST-VFGGHRPS---WWMVIVLVGVA---VVILFV
V---TSIFAAMANREACKDGLLAEQKCNLTHLLEHQLTQAQNVLLGMKI
QAATCNQTVVTLTASLETEKAHGHKQQELVQQQELQGEIEKLLKQKLQD----
-----TTT-----ELEQLRKKNDAS-----
-EGNGSTSS-----GNTINSLAIYVLLTSLGALLA
>Tetherin_(Taphozous_melanopogon)
-----MDDYLEKLLKLDCKLP---RWLGILLLLL---VVGEFV
L---LIIFGVRDSSNVCKDSLRAEQEQRNITHLLQHQLTQAQEVVLETEA
QAASCNKTVVTLMESLEKEKAQGHKQQELVQELQEEIEKLLKQELQD----
-----TGTEL-----ELERLRKKDESW-----
-GLKTNSNS-----GNILRPLAITVLLTCLRLLA
>Tetherin_(Carollia_brevicauda)
MTSTFYHYTLPLMGKNSRELMLGYYQLPRQLKILLALLGLL---VVGLSV

```

A---TTIFAVQAFSPACKDGRRAEQECRNFTHLLQRQLTQAQDILLKTEA  
QAATYNQTAETLMASLKVEQAQGQKLQEQVQELQEEIETLKQKLQDTTQK  
LQDTTQKLQD-----TTQKLQGTAE LNQLRKDHESC-----  
---GYDSTNS-----GNTLGLSVVAMLLTSLLDLLA  
>Tetherin\_(Carollia\_perspicillata)  
MTSTFYHYTLPLPMGKNSRELMLGYYQLPRQLKILLALLGLL---VVGLSV  
A---TTIFAVQAFSPACKDGRRAEQECRNFTHLLQRQLTQAQDILLKTEA  
QAATYNQTAETLMASLKVEQAQGQKLQEQVQELQEEIETLKQKLQDTTQK  
LQDTTQKLQD-----TTQKLQGTAE LNQLRKDHESC-----  
---SYDSTNS-----GNTLGLSVVAMLLTSLLDLLA  
>Tetherin\_(Desmodus\_rotundus)  
MTSTFYHYIPLPMSSENSRELMLEYHKLP---RWLGILLALLVLLVVGLLV  
A---TIILAVQAHSACKDGRRAEQECRNFTHLLSQRTAQEILLKTKA  
QAATYNQTVVTLMASLKVEQAQGQKLREQVQELQEEIKTLKQKLQDTTQK  
LQVTTTELQNTTQKLQVTTAKLQVTTQKLQDTTTELNQLRKDHESF----  
-GWNGSTSS-----GNTLSLSVVVLLLLTSLLDLLA  
>Tetherin\_(Macrotus\_californicus)  
MAPTFYHYVPLPMGDNSKMLMRGYKLP---KWLVI LLALLVLLVVGLLL  
A---TITFAVQAHRPACKDGHRAEQECRNFTHLLSQQTQTQEILLKTKA  
EAATYNQTVVTLMASLKVEQAQGQKLQEQVQELQEEIKTLKQKLQD----  
-----TTQKLQDTTTELNQLREDQESF-----  
-SRHHGSTSS-----GSTLSLSVVTMLLLTLRLLDLLA  
>Tetherin\_(Artibeus\_jamaicensis)  
MTSTFYHYTSLPSDENSREQMQGHYKIP---LWLSILLALL---GTGLVV  
AMALAIIFYNQAHSACKDGFKMEQECQNVNTSLKSKLAQTQEILLKTEA  
QAATYNQTAETLMASLKVEQAQGQMLQKQVQELQKEIKTLKQNLQD----  
-----TTQKLQDTTQKLNQLRKDHES-----  
-GPGKGPTDS-----GNTLSLSMISMLLLTSLLDLLA  
>Tetherin\_(Uroderma\_bilobatum)  
MTSTFYHYISLPLDENSREQMQGHYKMP---RWLLILLALL---VVGLVV  
ASALAIYFAHQAHSPACKNGLKVEQECQNVTDLSKSKLAQTQEILLKTEA  
QAATYNQTVAAQMASLKAERAQSQKLQEQVQELQKEIKTLKQKLQD----  
-----TTQKLQDTTAE LNQLRKDHGSS-----  
-SRGNPTSS-----ENTLSLSVVAMLLTSLLDLLA  
>Tetherin\_(Tadarida\_basiliensis)  
MAPTFY-YRPLSMDECSEYKQYWRP---RCLVITVFLM---LVSMSV  
T---VIVLAVKLNSTACKNGLQAEQECRNRTHLLNQLTQTQ---LKTEV  
QAATCNQTVATLMASLKKEKAQSDTQQLVQTLQEKIKELKQKLNT----  
-----SPD-----QGLRKENEAS-----  
-GGENSSTSF-----GNTLSRCVVTTLLAVSLQVLLA  
>Tetherin\_(Miniopterus\_natalensis)  
MAGTLYHHSVPVPMDDRSNNMLWCHRWL---KLLVIVPVMV-----VLIV  
L---VIILANRLNSITCKDVLGAEQECQNITY-LEHQLNQAQRVLLLETN-  
--ATCNQTVVTLMDSLKMEQAQGHKQQQLVQKLQEEIKELKQNVQN----  
-----TSM-----ELERLRKWKETS-----  
-GREEDSTSS-----GNTFSLCMVIVLLPLTLEVLLA  
>Tetherin\_(Miniopterus\_schreibersii)  
MAGTLYHHSVPVPMGDRSNNMLWCHRWL---KLLVIVPVMV-----VLIV  
L---VIILANRPNGITCKDVLRAEQECQNITY-LEHQLNQAQRVLLLETN-  
--ATCNQTVVTLMDSLKMEQAQGHKQQQLVQKLQEEIKELKQNLQN----  
-----TSM-----ELERLRKWKETS-----  
-GREEDSTSS-----GNTFSLCMVIVLLPLTLEVLLT
